# Supplementary material for: N-(2-(Diphenylphosphino)ethyl)-2-alkyl-5,6,7,8-tetrahydro-quinolin-8-amines iron(ii) complexes: structural diversity and the ring opening polymerization of ε-caprolactone
Source: Royal Society of Chemistry journal article supplement (doi:10.1039/d3ra05867k), 2023-01-01
Supplement: d3ra05867k1.pdf [file d3ra05867k1.pdf]

Supporting information  
of  
***N*-(2-(Diphenylphosphino)ethyl)-2-alkyl-5,6,7,8-tetrahydroquinolin-8-amines  
iron(II) complexes: Structural diversity and the ring opening polymerization of  
 $\epsilon$ -caprolactone**

Yun Wang,<sup>a,b,c</sup> Wenjuan Zhang,<sup>\*,a,b</sup> Xing Wang,<sup>b,c</sup> Weiwei Zuo,<sup>\*,a</sup> Xiaopan Xue,<sup>b</sup>  
Yanping Ma,<sup>a</sup> Wen-Hua Sun<sup>\*,c</sup>

| Table of contents |                                                                                                                                          | Page |
|-------------------|------------------------------------------------------------------------------------------------------------------------------------------|------|
| 1.                | <b>Fig. S1</b> <sup>1</sup> H NMR spectrum of <b>L5</b>                                                                                  | S2   |
| 2.                | <b>Fig. S2</b> <sup>13</sup> C NMR spectrum of <b>L5</b>                                                                                 | S2   |
| 3.                | <b>Fig. S3</b> <sup>31</sup> P NMR spectrum of <b>L5</b>                                                                                 | S3   |
| 4.                | <b>Fig. S4</b> <sup>1</sup> H NMR spectrum of <b>L6</b>                                                                                  | S3   |
| 5.                | <b>Fig. S5</b> <sup>13</sup> C NMR spectrum of <b>L6</b>                                                                                 | S4   |
| 6.                | <b>Fig. S6</b> <sup>31</sup> P NMR spectrum of <b>L6</b>                                                                                 | S4   |
| 7.                | <b>Fig. S7</b> <sup>1</sup> H NMR spectrum of <b>L7</b>                                                                                  | S5   |
| 8.                | <b>Fig. S8</b> <sup>13</sup> C NMR spectrum of <b>L7</b>                                                                                 | S5   |
| 9.                | <b>Fig. S9</b> The monitoring <sup>31</sup> P NMR spectrum of <b>L4</b> in CDCl <sub>3</sub>                                             | S6   |
| 10.               | <b>Fig. S10</b> The monitoring <sup>31</sup> P NMR spectrum of <b>L1</b> in CDCl <sub>3</sub>                                            | S6   |
| 11.               | <b>Fig. S11</b> MALDI-TOF mass spectrum of the PCL obtained using <b>Fe6</b> ([ $\epsilon$ -CL]/[Fe] = 100:1, T = 30 °C, t = 10 min)     | S7   |
| 12.               | <b>Fig. S12</b> <sup>1</sup> H NMR spectrum of the PCL obtained using <b>Fe6</b> ([ $\epsilon$ -CL]/[Fe] = 100:1, T = 30 °C, t = 10 min) | S7   |
| 13.               | <b>Fig. S13</b> MALDI-TOF mass spectrum of the PCL obtained using <b>Fe6</b> ([ $\epsilon$ -CL]/[Fe] = 400:1, T = 30 °C, t = 10 min)     | S8   |
| 14.               | <b>Fig. S14</b> <sup>1</sup> H NMR spectrum of the PCL obtained using <b>Fe6</b> ([ $\epsilon$ -CL]/[Fe] = 400:1, T = 30 °C, t = 10 min) | S8   |
| 15.               | <b>Fig. S15</b> MALDI-TOF mass spectrum of the PCL obtained using <b>Fe6</b> ([ $\epsilon$ -CL]/[Fe] = 800:1, T = 30 °C, t = 10 min)     | S9   |
| 16.               | <b>Fig. S16</b> <sup>1</sup> H NMR spectrum of the PCL obtained using <b>Fe6</b> ([ $\epsilon$ -CL]/[Fe] = 800:1, T = 30 °C, t = 10 min) | S9   |
| 17.               | <b>Table S1</b> Crystal data and structure refinements for <b>Fe4'</b>                                                                   | S10  |
| 18.               | <b>Table S2</b> Selected bond lengths (Å) and angles (°) for <b>Fe4'</b>                                                                 | S10  |
| 19.               | <b>Fig. S17</b> The GPC spectra of high molecular PCL using <b>Fe6</b> ([ $\epsilon$ -CL]/[Fe] = 1800:1, T = 90 °C, t = 10 min)          | S11  |
| 20.               | <b>Fig. S18</b> The GPC spectra of high molecular PCL using <b>Fe6</b> ([ $\epsilon$ -CL]/[Fe] = 2000:1, T = 90 °C, t = 10 min)          | S11  |
| 21.               | <b>Fig. S19</b> The GPC spectra of high molecular PCL using <b>Fe4</b> ([ $\epsilon$ -CL]/[Fe] = 1500:1, T = 90 °C, t = 10 min)          | S12  |
| 22.               | <b>Fig. S20</b> The GPC spectra of high molecular PCL using <b>Fe5</b> ([ $\epsilon$ -CL]/[Fe] = 1500:1, T = 90 °C, t = 10 min)          | S12  |
| 23.               | <b>Fig. S21</b> <sup>1</sup> H NMR spectrum of <b>L8</b>                                                                                 | S13  |

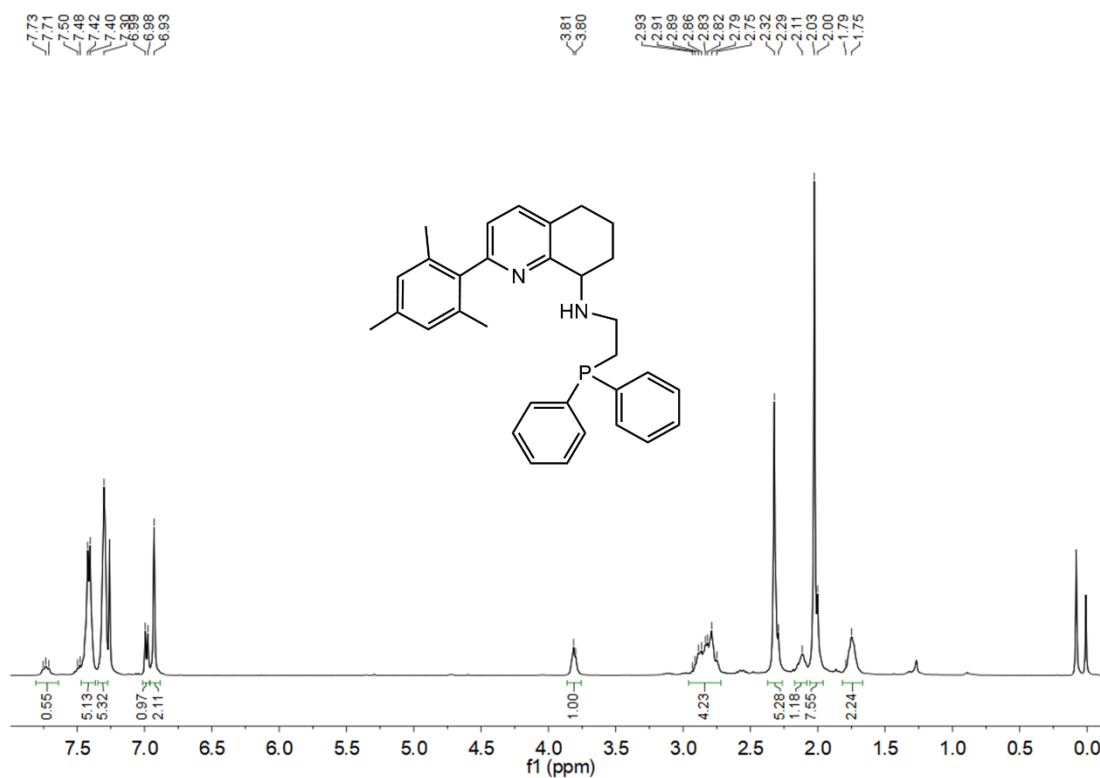

**Fig. S1**  $^1\text{H}$  NMR ( $\text{CDCl}_3$ ,  $25^\circ\text{C}$ ) spectrum of **L5**

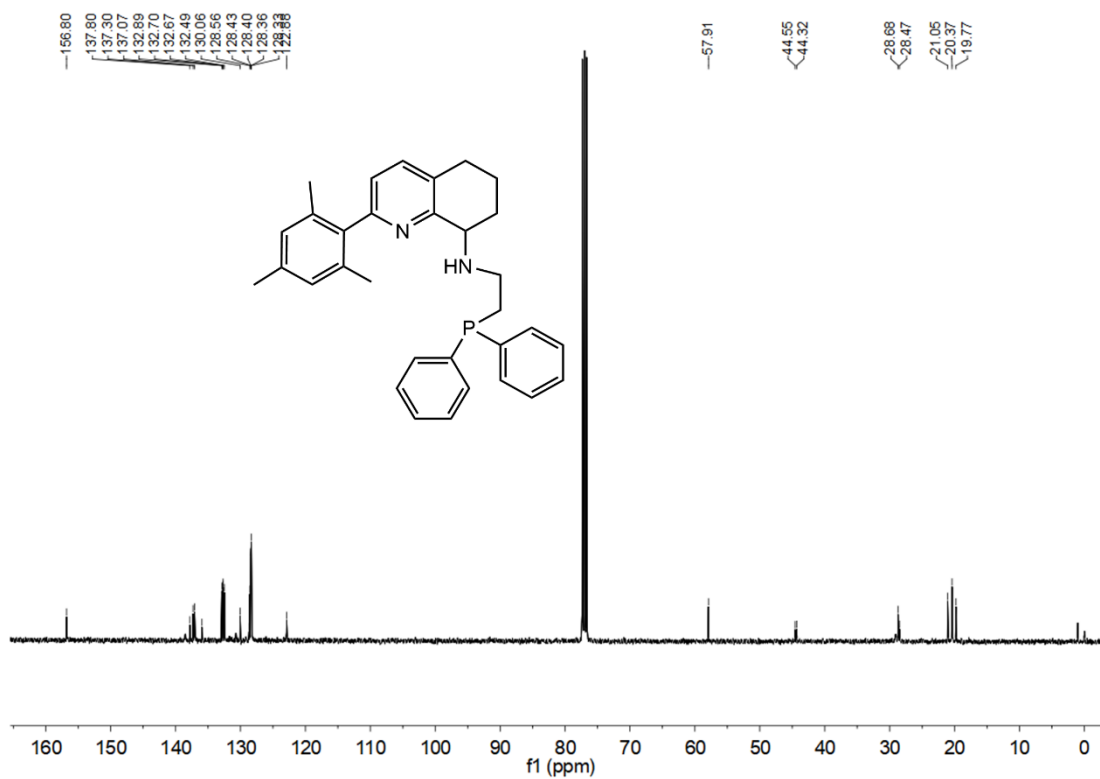

**Fig. S2**  $^{13}\text{C}$  NMR ( $\text{CDCl}_3$ ,  $25^\circ\text{C}$ ) spectrum of **L5**

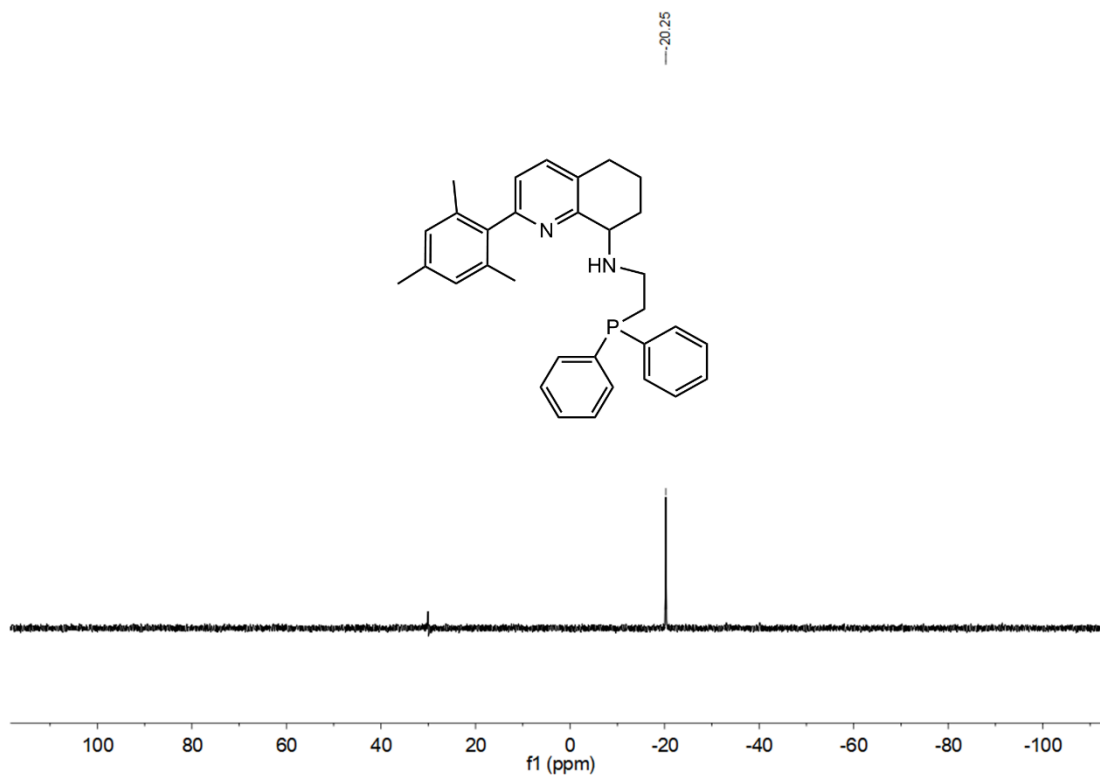

**Fig. S3**  $^{31}\text{P}$  NMR ( $\text{CDCl}_3$ ,  $25^\circ\text{C}$ ) spectrum of **L5**

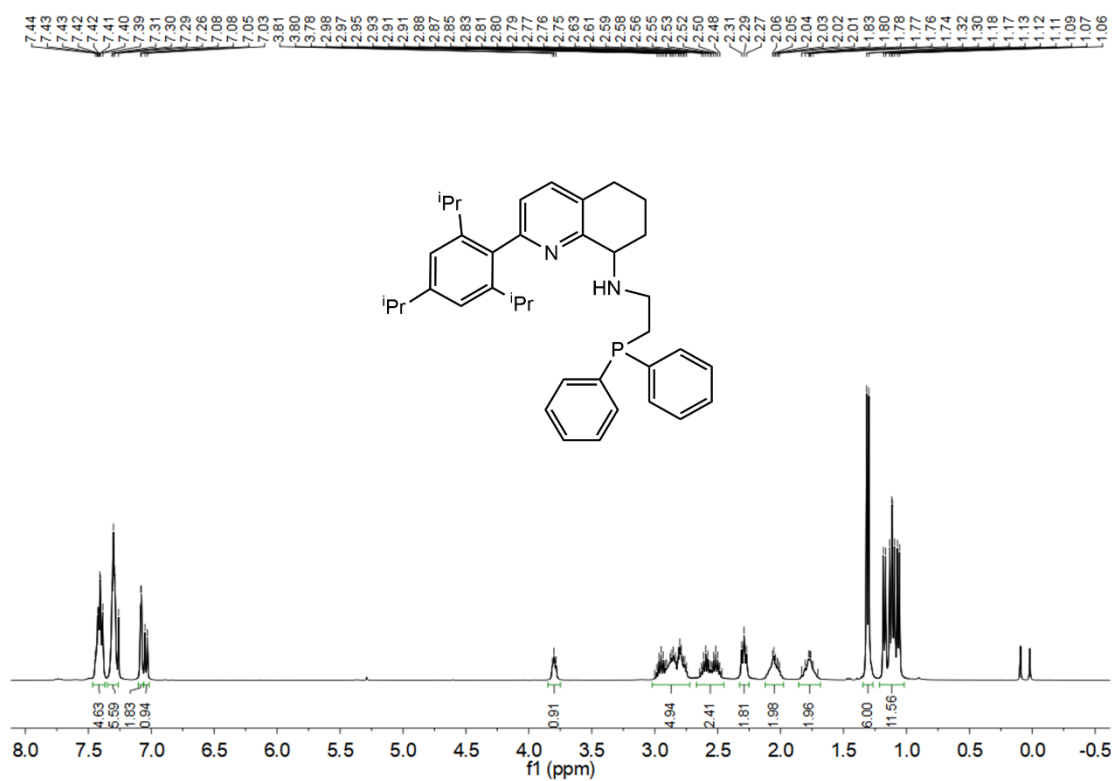

**Fig. S4**  $^1\text{H}$  NMR ( $\text{CDCl}_3$ ,  $25^\circ\text{C}$ ) spectrum of **L6**

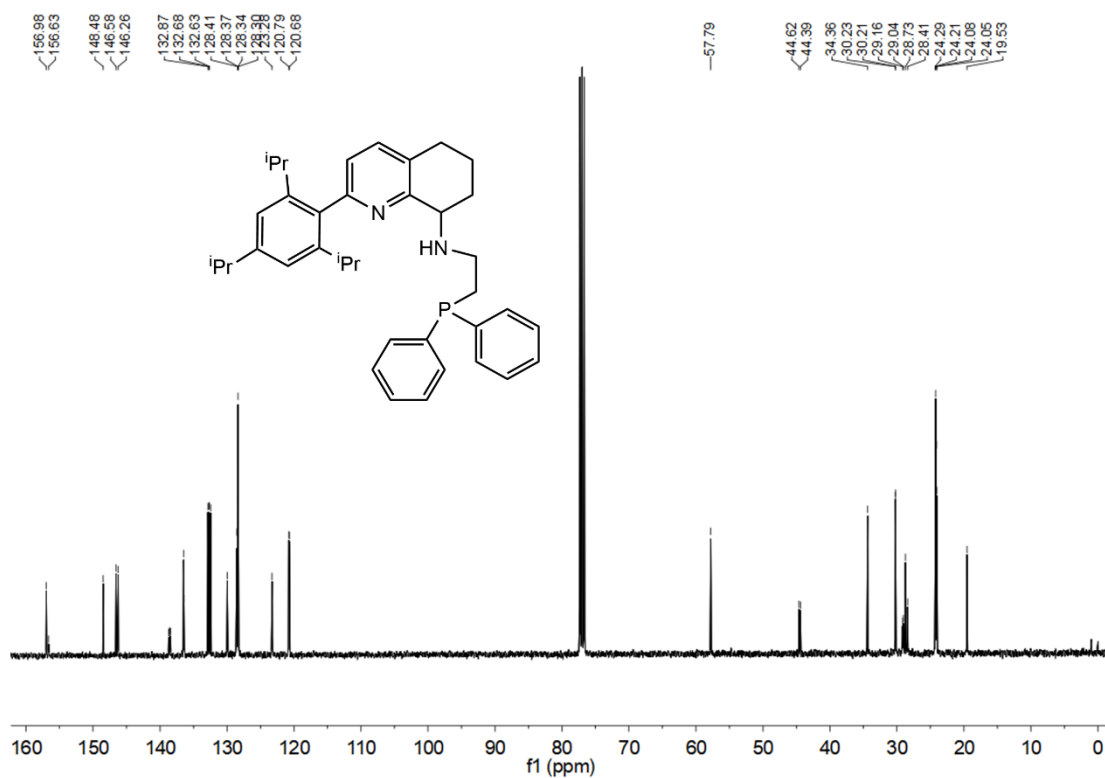

**Fig. S5** <sup>13</sup>C NMR (CDCl<sub>3</sub>, 25°C) spectrum of L6

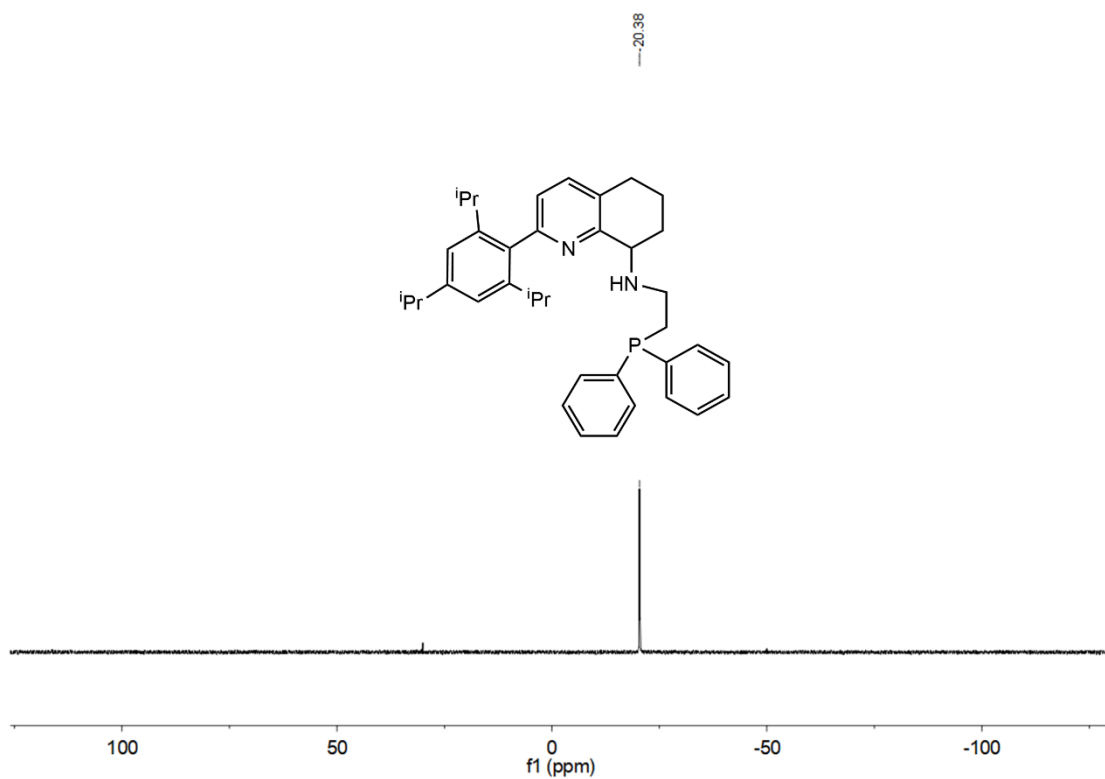

**Fig. S6** <sup>31</sup>P NMR (CDCl<sub>3</sub>, 25°C) spectrum of L6

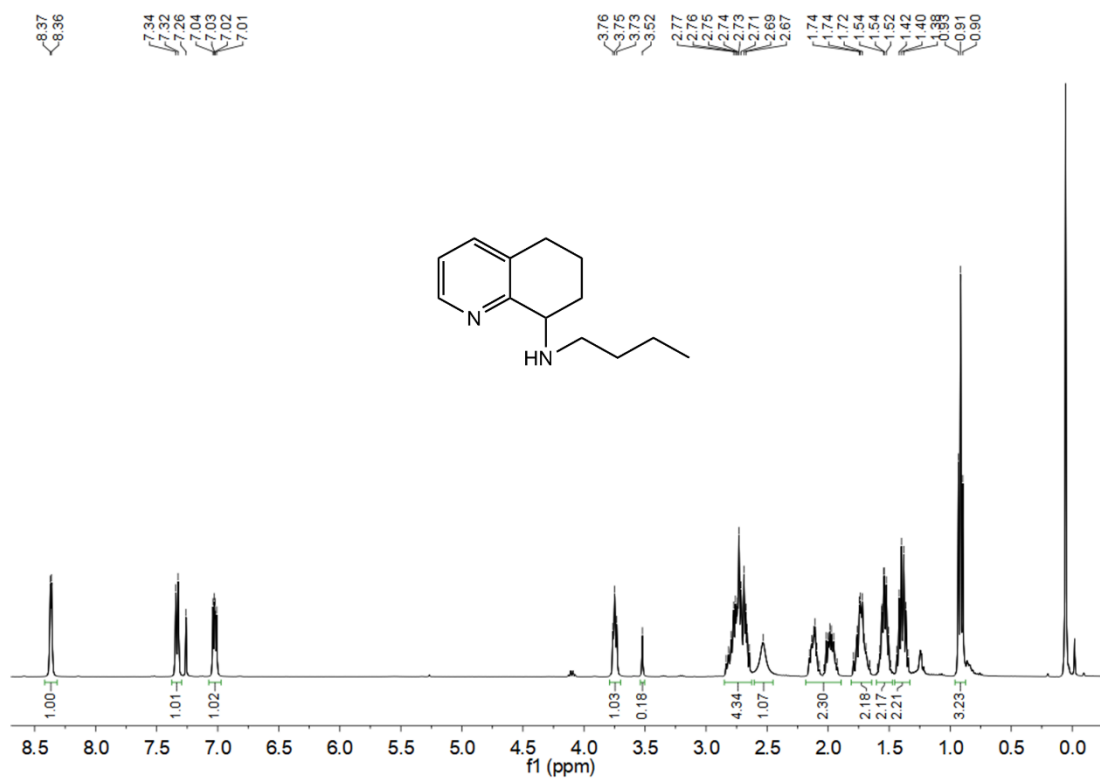

**Fig. S7** <sup>1</sup>H NMR (CDCl<sub>3</sub>, 25°C) spectrum of L7

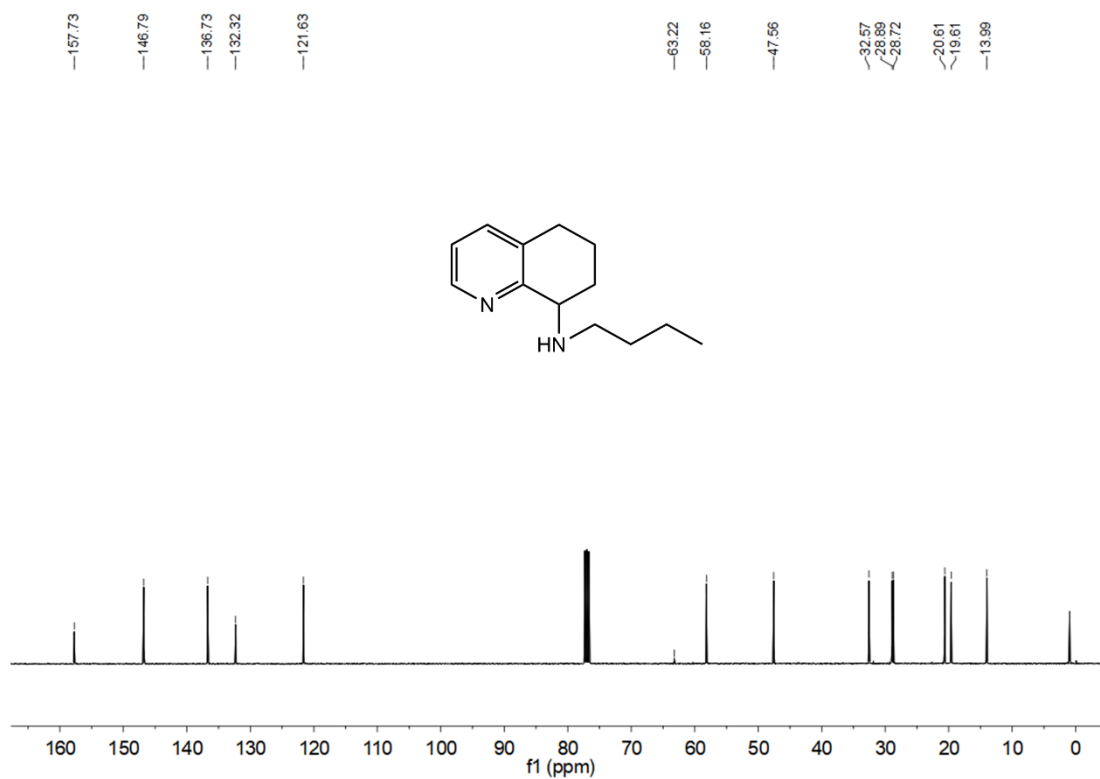

**Fig. S8** <sup>13</sup>C NMR (CDCl<sub>3</sub>, 25°C) spectrum of L7

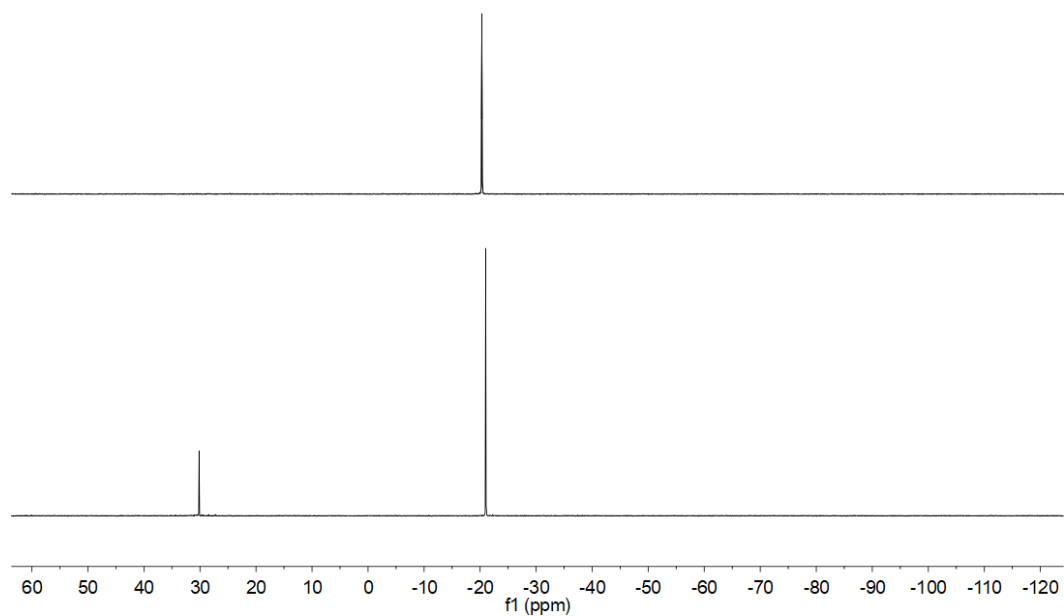

**Fig. S9** The monitoring  $^{31}\text{P}$  NMR spectra of **L4** in  $\text{CDCl}_3$  (top) and **L4** in  $\text{CDCl}_3$  (bottom, two weeks later)

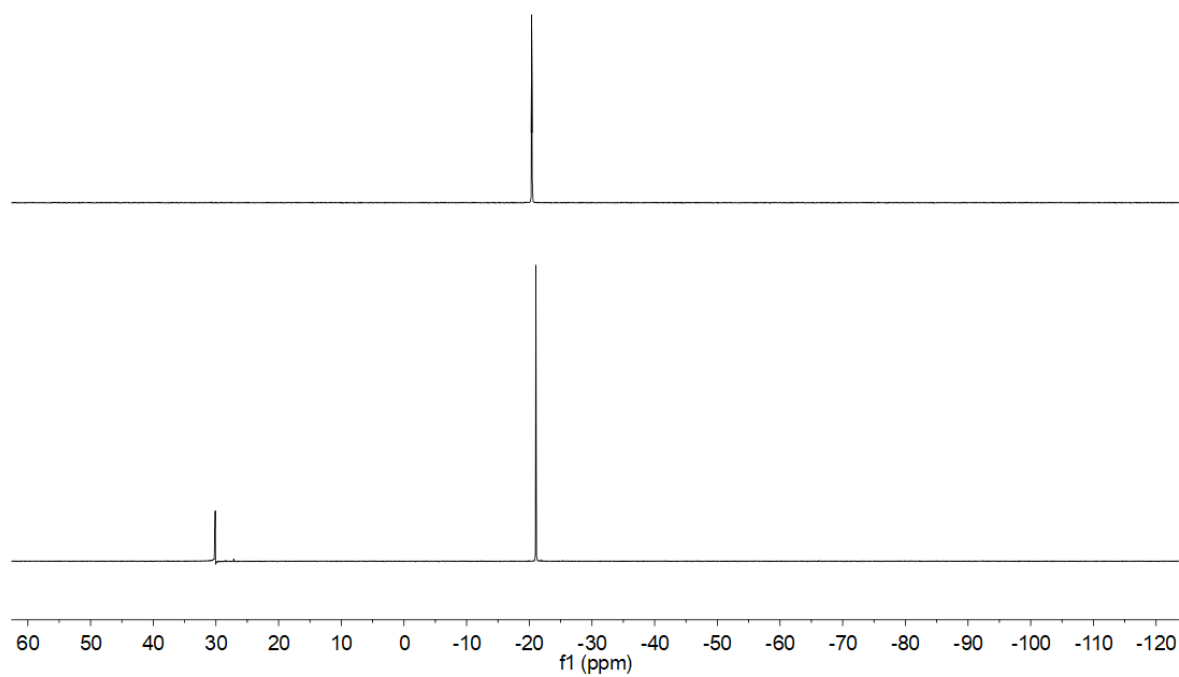

**Fig. S10** The monitoring  $^{31}\text{P}$  NMR spectra of **L1** in  $\text{CDCl}_3$  (top) and **L1** in  $\text{CDCl}_3$  (bottom, two weeks later)

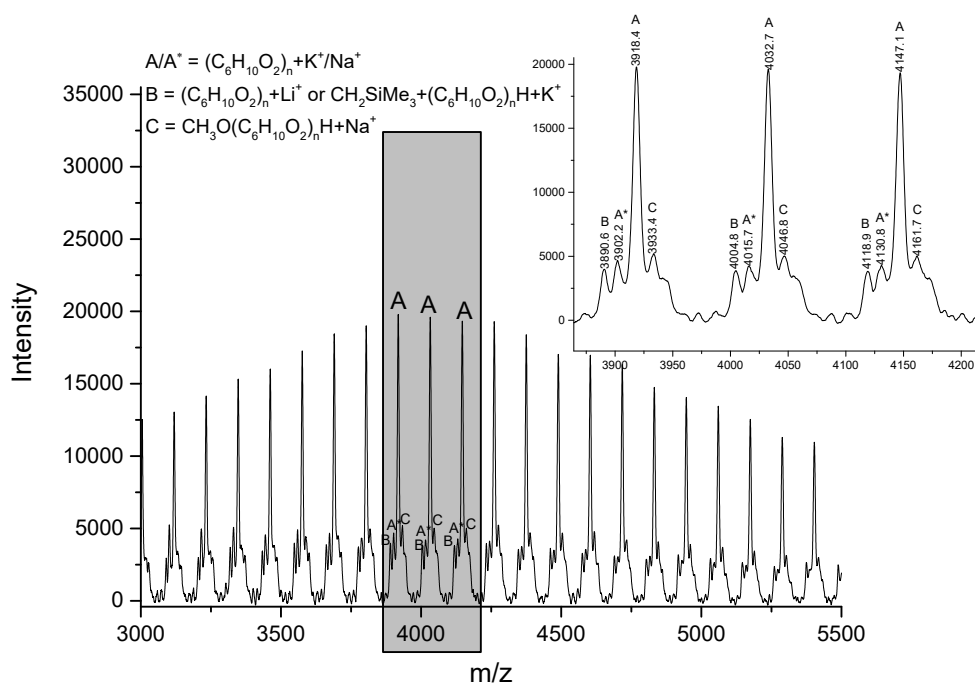

**Fig. S11** MALDI-TOF mass spectrum of the PCL obtained using **Fe6** ( $[\epsilon\text{-CL}]/[\text{Fe}] = 100:1$ ,  $T = 30\text{ }^\circ\text{C}$ ,  $t = 10\text{ min}$ )

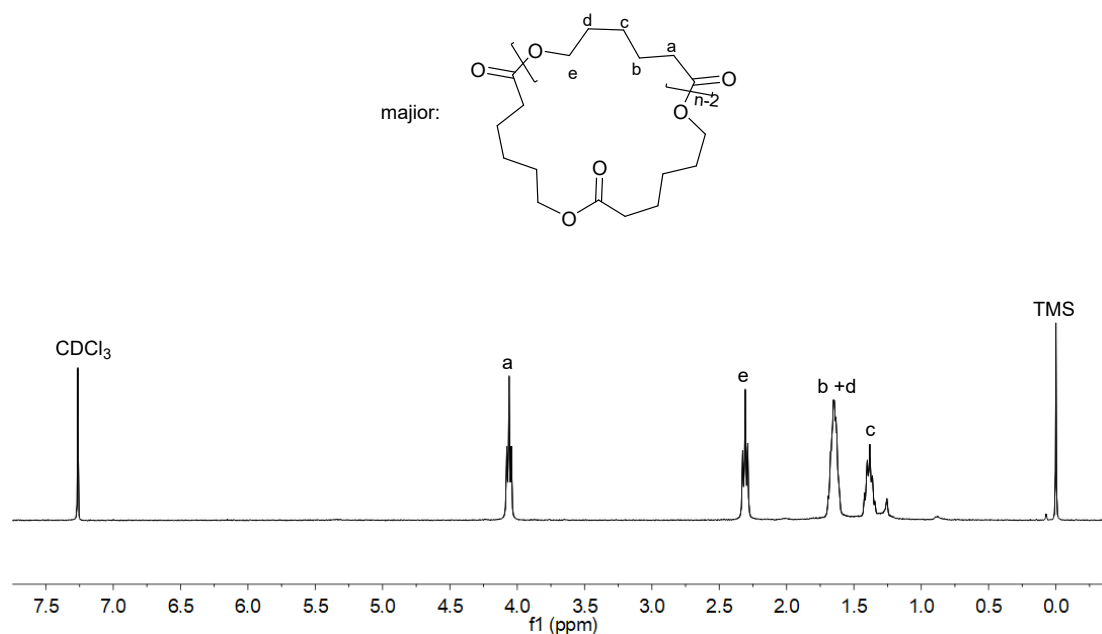

**Fig. S12**  $^1\text{H}$  NMR spectrum of the PCL obtained using **Fe6** ( $[\epsilon\text{-CL}]/[\text{Fe}] = 100:1$ ,  $T = 30\text{ }^\circ\text{C}$ ,  $t = 10\text{ min}$ )

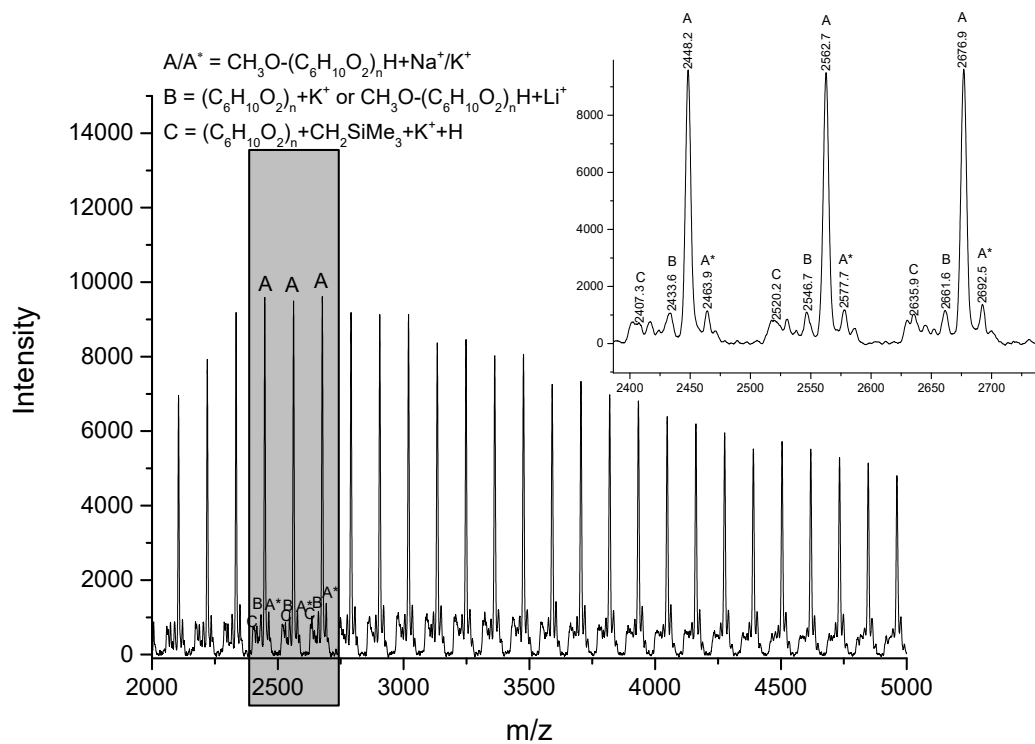

**Fig. S13** MALDI-TOF mass spectrum of the PCL obtained using **Fe6** ( $[\epsilon\text{-CL}]/[\text{Fe}] = 400:1$ ,  $T = 30\text{ }^\circ\text{C}$ ,  $t = 10\text{ min}$ )



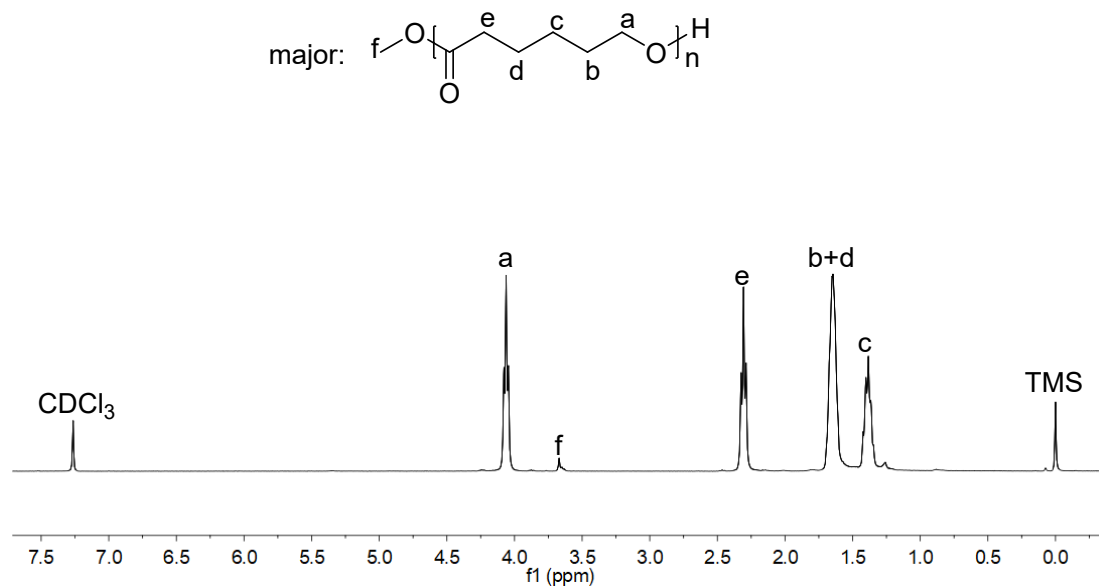

**Fig. S14** <sup>1</sup>H NMR spectrum of the PCL obtained using **Fe6** ([ε-CL]/[Fe] = 400:1, T = 30 °C, t = 10 min)

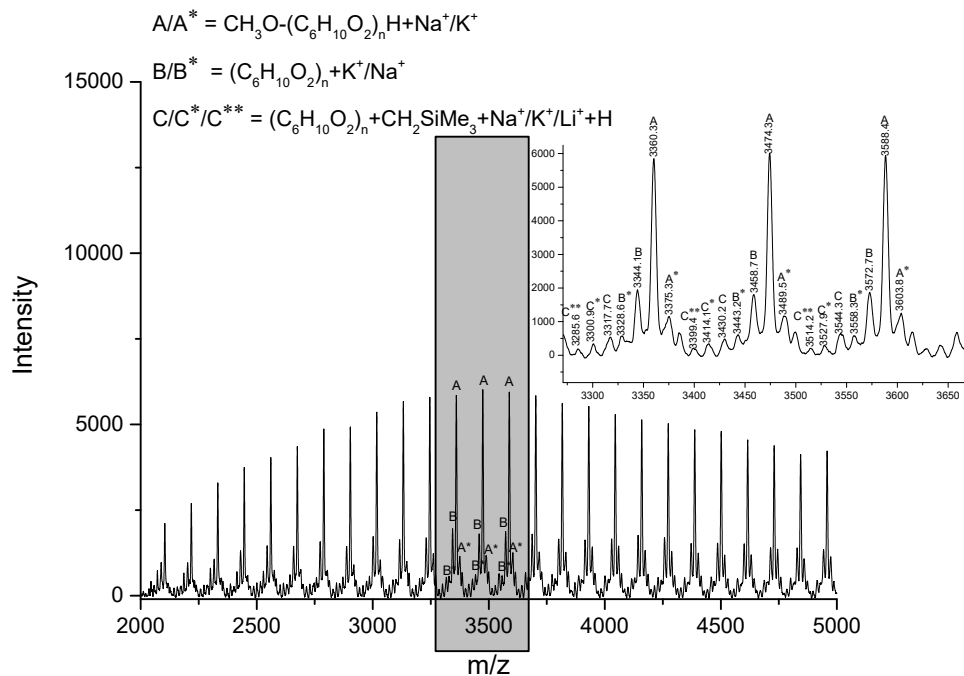

**Fig. S15** MALDI-TOF mass spectrum of the PCL obtained using **Fe6** ([ε-CL]/[Fe] = 800:1, T = 30 °C, t = 10 min)

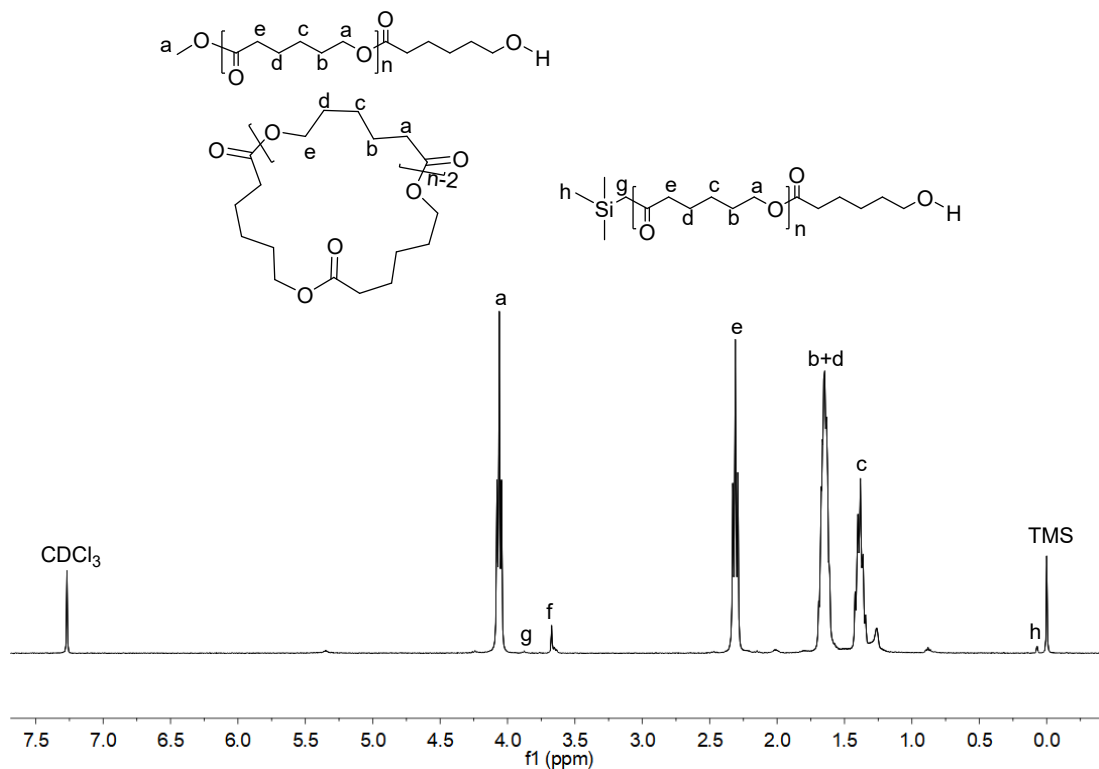

**Fig. S16** <sup>1</sup>H NMR spectrum of the PCL obtained using **Fe6** ([ $\epsilon$ -CL]/[Fe] = 800:1, T = 30 °C, t = 10 min)

**Table S1** Crystal data and structure refinements for **Fe4'**

|                               | <b>Fe4'</b>                                                                         |
|-------------------------------|-------------------------------------------------------------------------------------|
| empirical formula             | C <sub>23</sub> H <sub>24</sub> Cl <sub>5</sub> Fe <sub>1.5</sub> N <sub>2</sub> OP |
| formula weight                | 636.44                                                                              |
| temperature/K                 | 169.98(10)                                                                          |
| crystal system                | monoclinic                                                                          |
| space group                   | P2 <sub>1</sub> /n                                                                  |
| <i>a</i> /Å                   | 12.0592(3)                                                                          |
| <i>b</i> /Å                   | 15.9546(4)                                                                          |
| <i>c</i> /Å                   | 13.9879(3)                                                                          |
| $\alpha$ /°                   | 90                                                                                  |
| $\beta$ /°                    | 94.627(2)                                                                           |
| $\gamma$ /°                   | 90                                                                                  |
| volume/Å <sup>3</sup>         | 2682.50(11)                                                                         |
| <i>Z</i>                      | 4                                                                                   |
| $\rho$ calc/g cm <sup>3</sup> | 1.576                                                                               |
| $\mu$ /mm <sup>-1</sup>       | 11.901                                                                              |
| <i>F</i> (000)                | 1292.0                                                                              |
| crystal size/mm <sup>3</sup>  | 0.2 × 0.12 × 0.1                                                                    |
| radiation                     | CuK $\alpha$ ( $\lambda$ = 1.54184)                                                 |

|                                            |                                                               |
|--------------------------------------------|---------------------------------------------------------------|
| 2 $\theta$ range for data collection/°     | 8.422 to 154.838                                              |
| index ranges                               | -15 ≤ h ≤ 14, -19 ≤ k ≤ 20, -17 ≤ l ≤ 16                      |
| reflections collected                      | 22038                                                         |
| independent reflections                    | 5463 [R <sub>int</sub> = 0.0738, R <sub>sigma</sub> = 0.0545] |
| data/restraints/parameters                 | 5463/0/304                                                    |
| goodness-of-fit on F <sup>2</sup>          | 1.043                                                         |
| final R indices [I ≥ 2σ (I)]               | R <sub>1</sub> = 0.0537, wR <sub>2</sub> = 0.1424             |
| final R indices [all data]                 | R <sub>1</sub> = 0.0636, wR <sub>2</sub> = 0.1502             |
| largest diff. peak/hole/ e Å <sup>-3</sup> | 0.97/-0.67                                                    |

**Table S2** Selected bond lengths (Å) and angles (°) **Fe4'**

| Bond length (Å) |          |           |            |
|-----------------|----------|-----------|------------|
| Fe1-N1          | 2.287(3) | P1-O1     | 1.501(2)   |
| Fe1-N2          | 2.251(3) | N2-C8     | 1.479(4)   |
| Fe1-O1          | 2.046(2) |           |            |
| Bond angles (°) |          |           |            |
| O1-Fe1-N1       | 91.68(9) | O1-P1-C11 | 111.20(14) |
| O1-Fe1-N2       | 91.37(9) | C8-N2-Fe1 | 106.34(18) |
| N2-Fe1-N1       | 73.44(9) | P1-O1-Fe1 | 127.93(13) |

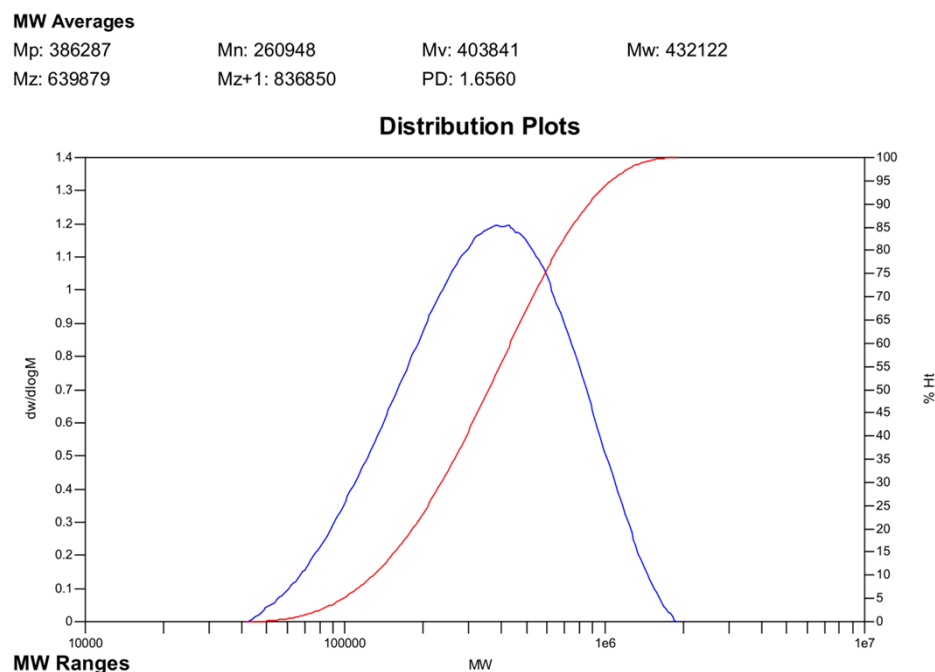

**Fig. S17** The GPC spectra of high molecular PCL using **Fe6** ([ $\epsilon$ -CL]/[Fe] = 1800:1, T = 90 °C, t = 10 min)

**MW Averages**

Mp: 386287      Mn: 239393      Mv: 411039      Mw: 443009  
Mz: 672520      Mz+1: 879051      PD: 1.8506

**Distribution Plots**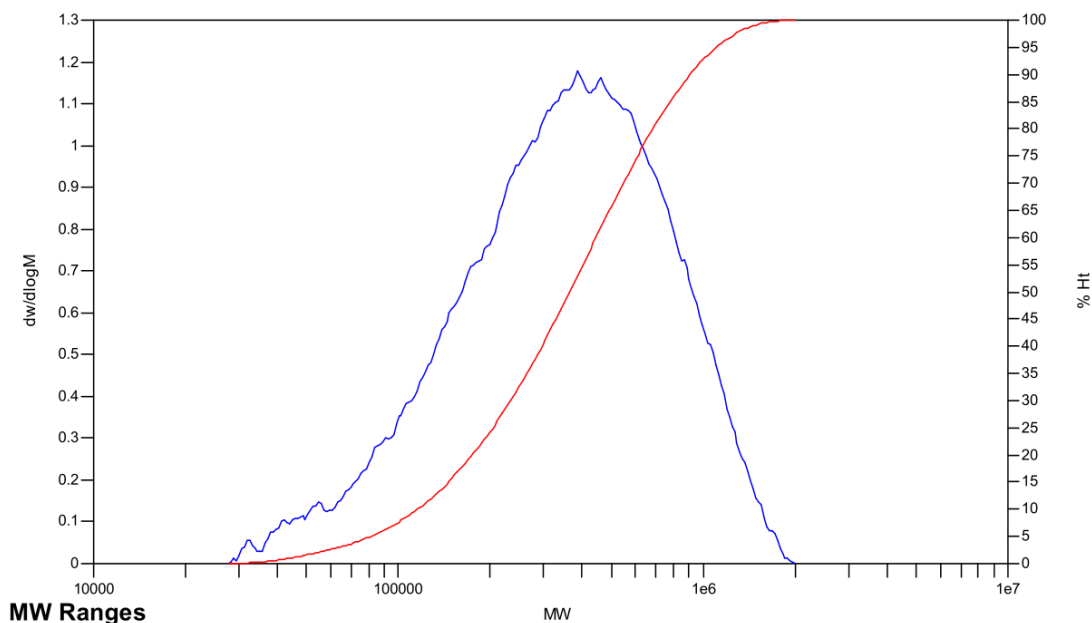

**Fig. S18** The GPC spectra of high molecular PCL using **Fe6** ( $[\epsilon\text{-CL}]/[\text{Fe}] = 2000:1$ ,  $T = 90\text{ }^\circ\text{C}$ ,  $t = 10\text{ min}$ )

**MW Averages**

Mp: 418688      Mn: 219258      Mv: 449554      Mw: 496962  
Mz: 865541      Mz+1: 1227595      PD: 2.2666

**Distribution Plots**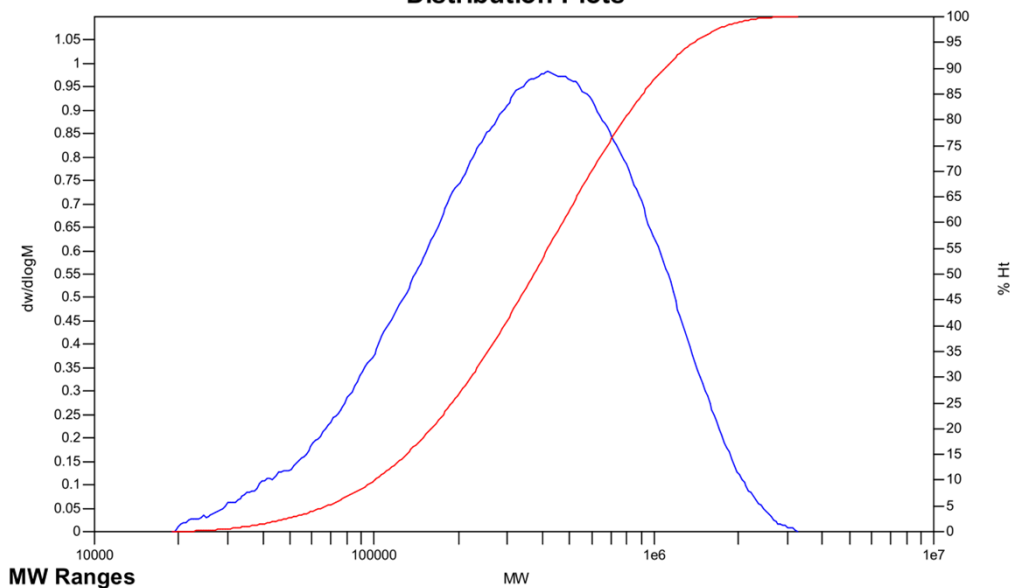

**Fig. S19** The GPC spectra of high molecular PCL using **Fe4** ( $[\epsilon\text{-CL}]/[\text{Fe}] = 1500:1$ ,  $T = 90\text{ }^\circ\text{C}$ ,  $t = 10\text{ min}$ )

**MW Averages**

Mp: 386287

Mn: 243463

Mv: 416567

Mw: 449661

Mz: 688598

Mz+1: 901882

PD: 1.8469

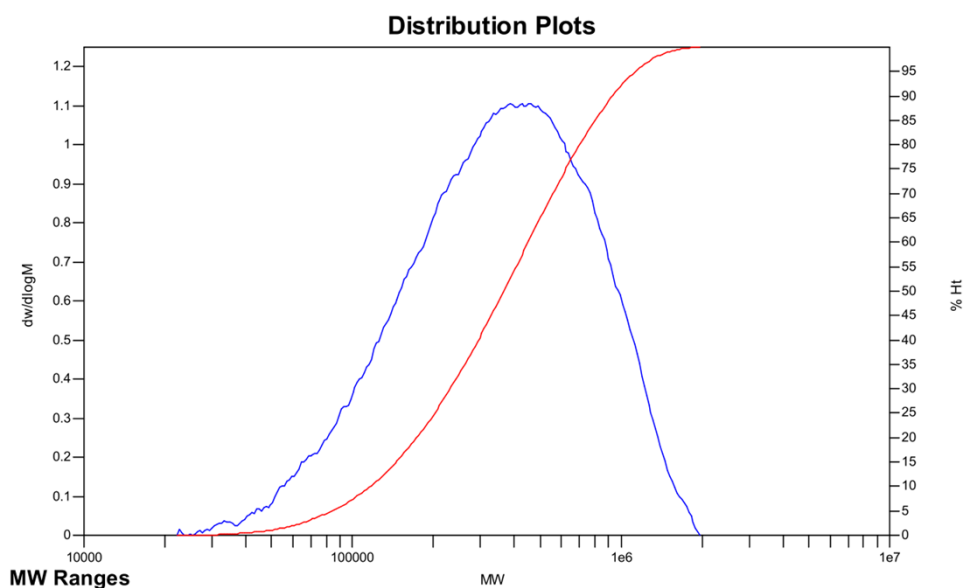

**Fig. S20** The GPC spectra of high molecular PCL using **Fe5** ( $[\epsilon\text{-CL}]/[\text{Fe}] = 1500:1$ ,  $T = 90\text{ }^\circ\text{C}$ ,  $t = 10\text{ min}$ )

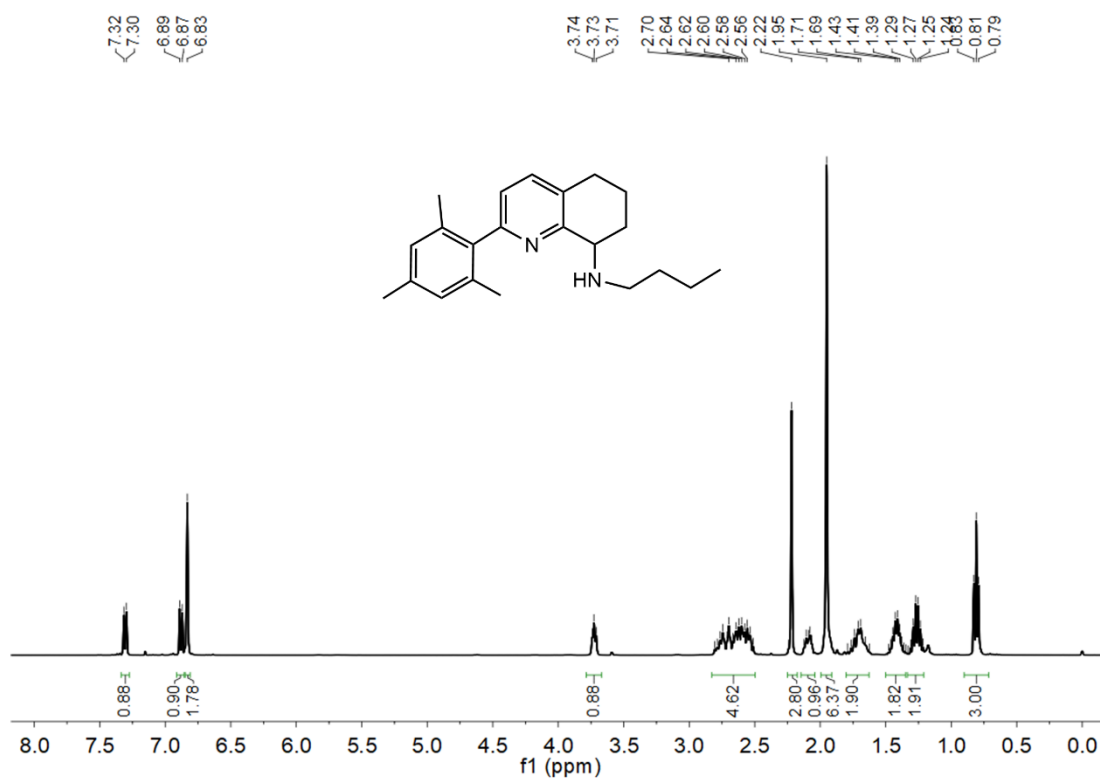

**Fig. S21**  $^{13}\text{C}$  NMR ( $\text{CDCl}_3$ ,  $25^\circ\text{C}$ ) spectrum of **L8**
